# Supplementary material for: Hollow Polyaniline Microsphere/Fe3O4 Nanocomposite as an Effective Adsorbent for Removal of Arsenic from Water
Source: PubMed Central journal article supplement (PMC7080834; doi:10.1038/s41598-020-61763-z), 2020-03-18
Supplement: 41598_2020_61763_MOESM1_ESM.pdf [file 41598_2020_61763_MOESM1_ESM.pdf]

## Supplementary Information

### **Hollow Polyaniline Microsphere/Fe<sub>3</sub>O<sub>4</sub> Nanocomposite as an Effective Adsorbent for Removal of Arsenic from Water**

*Soumi Dutta<sup>1</sup>, Kunal Manna<sup>2</sup>, Suneel Kumar Srivastava<sup>2,3\*</sup>, Ashok Kumar Gupta<sup>1+</sup>, Manoj Kumar Yadav<sup>4</sup>*

<sup>1</sup>School of Water Resources, Indian Institute of Technology Kharagpur, Kharagpur–721302, India

<sup>2</sup>Department of Chemistry, Indian Institute of Technology Kharagpur, Kharagpur–721302, India

<sup>3</sup>School of Energy Science and Engineering, Indian Institute of Technology Kharagpur, Kharagpur–721302, India

<sup>4</sup>School of Environmental Science and Engineering, Indian Institute of Technology Kharagpur, Kharagpur–721302, India

#### **For Correspondence:**

\*S.K. Srivastava ([sunil111954@yahoo.co.uk](mailto:sunil111954@yahoo.co.uk)), +A.K. Gupta ([agupta@civil.iitkgp.ac.in](mailto:agupta@civil.iitkgp.ac.in))

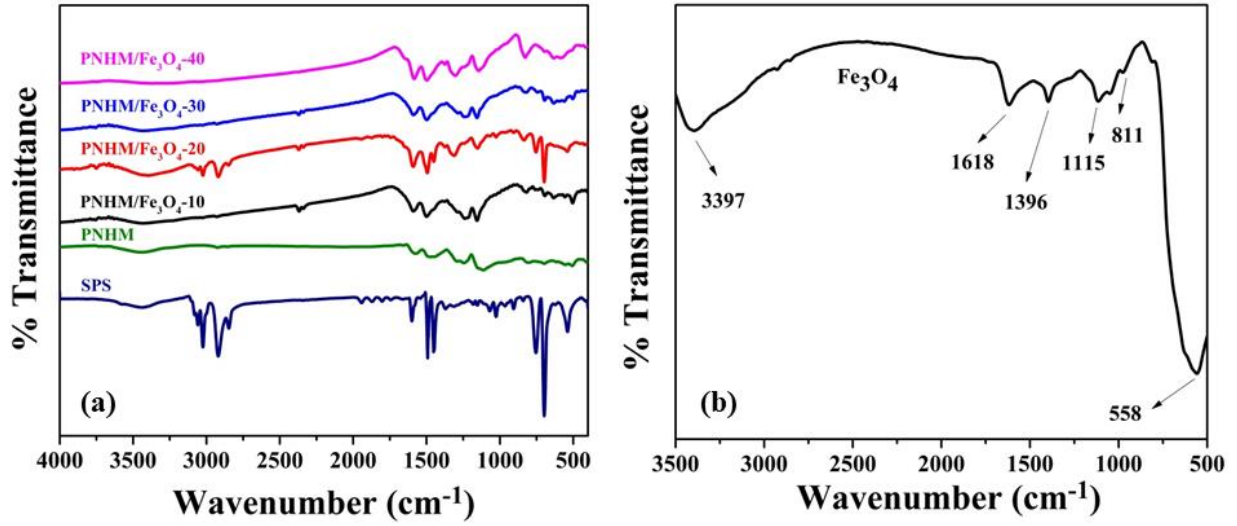

**Figure S1.** FTIR spectra of (a) SPS, PNHM and PNHM/Fe<sub>3</sub>O<sub>4</sub> composites; (b) Fe<sub>3</sub>O<sub>4</sub> nanoparticles.

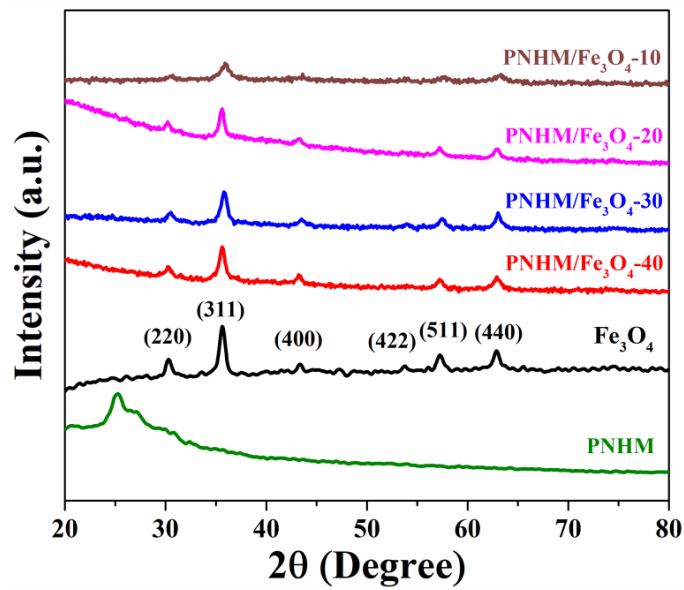

**Figure S2.** X-ray diffraction pattern of PNHM, Fe<sub>3</sub>O<sub>4</sub> and PNHM/Fe<sub>3</sub>O<sub>4</sub> composites.

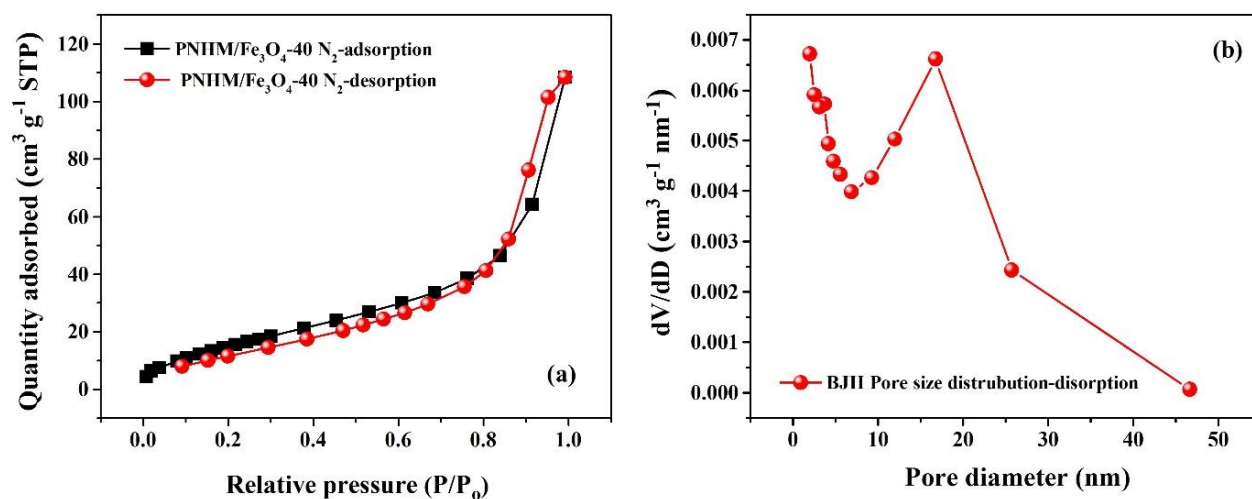

**Figure S3.** (a) N<sub>2</sub> adsorption–desorption isotherm measured for PNHM/Fe<sub>3</sub>O<sub>4</sub>-40; (b) BJH pore size distribution plot of PNHM/ Fe<sub>3</sub>O<sub>4</sub>-40.

**Table S1.** M<sub>s</sub>, M<sub>r</sub>, H<sub>c</sub> values of Fe<sub>3</sub>O<sub>4</sub> and PNHM/Fe<sub>3</sub>O<sub>4</sub>-40

| Materials                               | Saturation magnetization,<br>M <sub>s</sub> (emu g <sup>-1</sup> ) | Remanence,<br>M <sub>r</sub> (emu g <sup>-1</sup> ) | Coercivity,<br>H <sub>c</sub> (Oe) |
|-----------------------------------------|--------------------------------------------------------------------|-----------------------------------------------------|------------------------------------|
| Fe <sub>3</sub> O <sub>4</sub>          | ~66.733                                                            | ~4.293                                              | ~31.336                            |
| PNHM/Fe <sub>3</sub> O <sub>4</sub> -40 | ~24.398                                                            | ~0.558                                              | ~30.837                            |

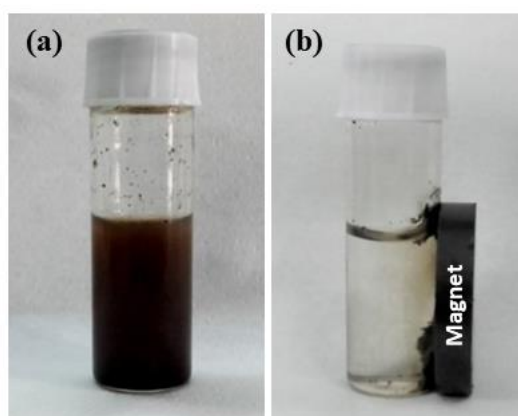

**Figure S4.** (a) Photos of PNHM/Fe<sub>3</sub>O<sub>4</sub>-40 dispersed in aqueous solution; (b) Separating by an external magnetic field.

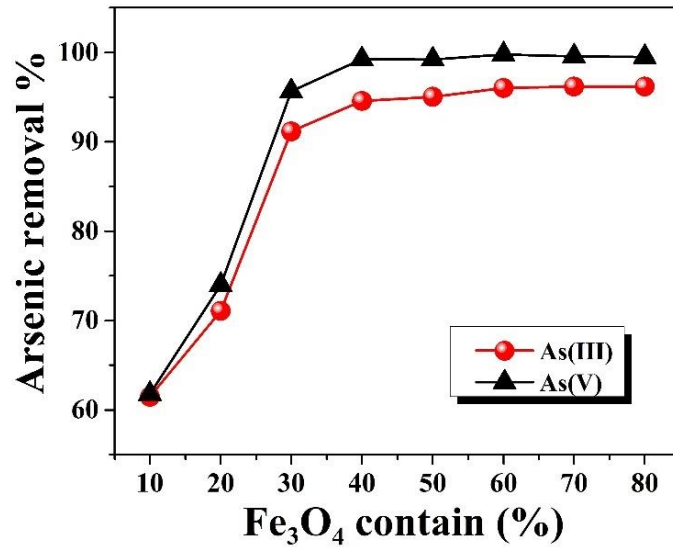

**Figure S5.** The effect of Fe<sub>3</sub>O<sub>4</sub> content in PNHM/Fe<sub>3</sub>O<sub>4</sub> nanocomposites on As(III) and As(V) uptake (Experimental conditions: C<sub>0</sub>: 1000 μg L<sup>-1</sup>; pH~7; adsorbent dose: 1g L<sup>-1</sup>; contact time: 240 min; T: 300±3 K)

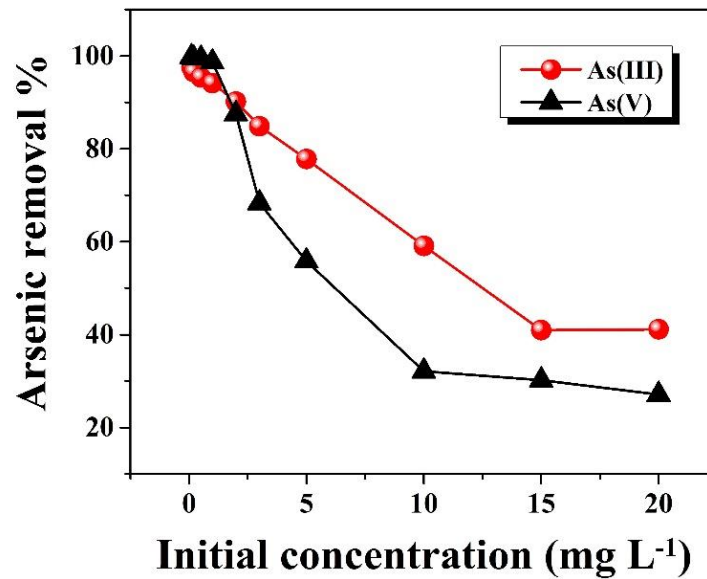

**Figure S6.** Effect of initial concentration of arsenic on removal efficiency (Experimental conditions: pH~7; adsorbent dose: 1g L<sup>-1</sup>; Contact time: 240 min; T: 300±3 K).

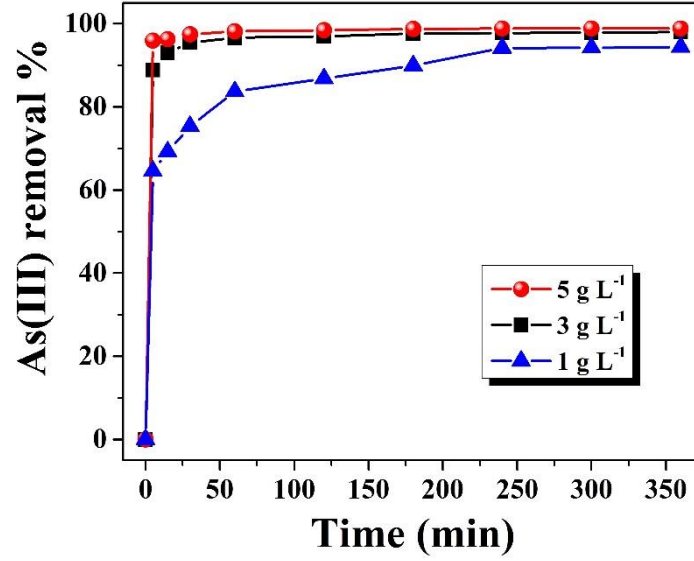

**Figure S7.** Effect of contact time on As(III) removal % at different adsorbent dose (1, 3, 5 g L<sup>-1</sup>) with a fixed adsorbate concentration (1000 µg L<sup>-1</sup>).

**SI-1: Adsorption kinetics.** The pseudo first-order kinetics model also referred as Lagergren first-order model, as following form<sup>1,2</sup>:

$$q_t = q_e(1 - e^{-k_1 t}) \quad (1)$$

where  $q_e$  and  $q_t$  indicates the amount arsenic uptake per unit weight (mg g<sup>-1</sup>) of PNHM/Fe<sub>3</sub>O<sub>4</sub>-40 at equilibrium and any time  $t$ , respectively, and  $k_1$  represents the rate constant (min<sup>-1</sup>) of pseudo first-order model. Experimental data's are also fitted in the pseudo second-order kinetic model using the rate equation described by Ho and McKay<sup>3</sup> as follows:

$$q_t = \frac{(k_2 q_e^2 t)}{(1 + k_2 q_e t)} \quad (2)$$

where  $k_2$  is the pseudo second-order rate constant. The residual root means square error (*RMSE*) was used to measure the goodness-of-fit and was calculated by the following equation:

$$RMSE = \sqrt{\frac{\sum_{i=1}^m (Q_i - q_i)^2}{m}} \quad (3)$$

Where,  $Q_i$  and  $q_i$  indicates the observed data from the batch experiment and estimate data from kinetics and isotherm models, respectively.  $m$  is the number of observations taken in the experiment. It is observed that the smaller  $RMSE$  value indicates the better curve-fitting.

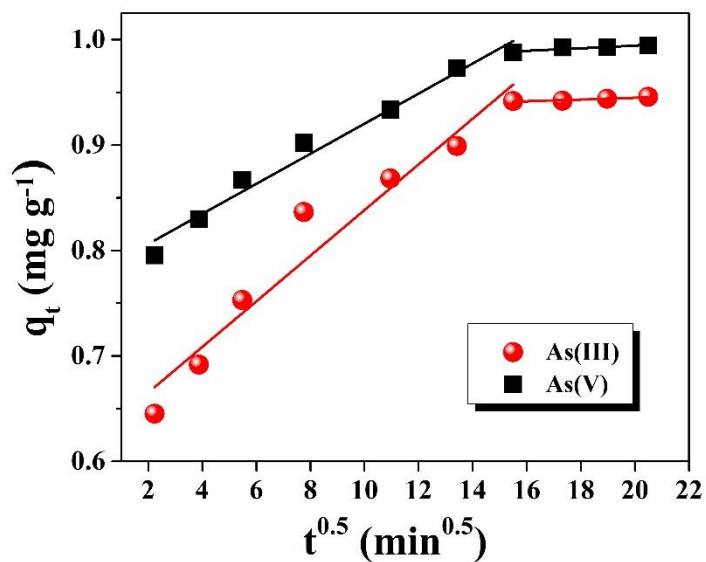

**Figure S8.** Kinetics data fitted to The Weber–Morris intra-particle diffusion plot for As(III) and As(V) adsorption on PNHM/Fe<sub>3</sub>O<sub>4</sub>-40 (Experimental conditions: adsorbent dose: 1g L<sup>-1</sup>; C<sub>0</sub>: 1000 μg L<sup>-1</sup>; pH~7; T: 300 ± 3 K).

**Table S2.** Kinetic parameters for As(III) and As(V) adsorption on PNHM/Fe<sub>3</sub>O<sub>4</sub>-40

| <b>Kinetic models</b>             | <b>Parameters</b>                               | <b>As(III)</b>            | <b>As(V)</b>         |       |
|-----------------------------------|-------------------------------------------------|---------------------------|----------------------|-------|
| Pseudo first-order model          | $q_e$ (mg g <sup>-1</sup> )                     | 0.877                     | 0.943                |       |
|                                   | $k_1$ (min <sup>-1</sup> )                      | 0.226                     | 0.359                |       |
|                                   | $R^2$                                           | 0.919                     | 0.964                |       |
|                                   | $Adj. R^2$                                      | 0.910                     | 0.960                |       |
|                                   | $RMSE$                                          | 0.083                     | 0.058                |       |
| Pseudo second-order model         | $q_e$ (mg g <sup>-1</sup> )                     | 0.916                     | 0.966                |       |
|                                   | $k_2$ (g mg <sup>-1</sup> min <sup>-1</sup> )   | 0.363                     | 0.733                |       |
|                                   | $R^2$                                           | 0.969                     | 0.983                |       |
|                                   | $Adj. R^2$                                      | 0.965                     | 0.982                |       |
|                                   | $RMSE$                                          | 0.051                     | 0.039                |       |
| Intra-particle<br>diffusion model | $k_d$ (mg g <sup>-1</sup> min <sup>-0.5</sup> ) | 0.022                     | 0.014                |       |
|                                   | Steep<br>slope                                  | $C$ (mg g <sup>-1</sup> ) | 0.622                | 0.778 |
|                                   |                                                 | $R^2$                     | 0.950                | 0.979 |
|                                   |                                                 | $Adj. R^2$                | 0.940                | 0.974 |
|                                   |                                                 | $RMSE$                    | 0.027                | 0.011 |
| Intra-particle<br>diffusion model | $k_d$ (mg g <sup>-1</sup> min <sup>-0.5</sup> ) | $8.2 \times 10^{-4}$      | 0.001                |       |
|                                   | Gradual<br>slope                                | $C$ (mg g <sup>-1</sup> ) | 0.929                | 0.969 |
|                                   |                                                 | $R^2$                     | 0.918                | 0.848 |
|                                   |                                                 | $Adj. R^2$                | 0.877                | 0.772 |
|                                   |                                                 | $RMSE$                    | $6.5 \times 10^{-4}$ | 0.001 |

**SI-2: Adsorption isotherm.** Langmuir isotherm model is described below<sup>4</sup>:

$$q_e = \frac{Q_m b C_e}{1 + b C_e} \quad (4)$$

where,  $b$  refers the Langmuir constant corresponding to the binding energy ( $\text{L mg}^{-1}$ ) of the solute and  $Q_m$  is the maximum adsorption capacity ( $\text{mg g}^{-1}$ ). In addition, Freundlich isotherm model has been used to describe adsorption of arsenic taking place on a heterogeneous surface<sup>5</sup> of PNHM/ $\text{Fe}_3\text{O}_4$ -40 is not restricted to monolayer formations and can be described as below:

$$q_e = K_f C_e^{\frac{1}{n}} \quad (5)$$

where,  $K_f$  and  $n$  are the Freundlich constant corresponding to the adsorption capacity [ $(\text{mg g}^{-1})(\text{L mg}^{-1})^{1/n}$ ] and intensity of the adsorption, respectively.

**Table S3.** Isotherm parameters for As(III) and As(V) adsorption on PNHM/ $\text{Fe}_3\text{O}_4$ -40

| <b>Isotherm models</b> | <b>Parameters</b>                                      | <b>As(III)</b> | <b>As(V)</b> |
|------------------------|--------------------------------------------------------|----------------|--------------|
| Langmuir isotherm      | $Q_m$ ( $\text{mg g}^{-1}$ )                           | 28.265         | 83.078       |
|                        | $b$ ( $\text{L mg}^{-1}$ )                             | 0.015          | 0.002        |
|                        | $R^2$                                                  | 0.907          | 0.987        |
|                        | $Adj. R^2$                                             | 0.901          | 0.986        |
|                        | $RMSE$                                                 | 3.047          | 2.212        |
| Freundlich isotherm    | $K_f$ [ $(\text{mg g}^{-1})(\text{L mg}^{-1})^{1/n}$ ] | 3.145          | 1.057        |
|                        | $1/n$                                                  | 0.326          | 0.576        |
|                        | $R^2$                                                  | 0.984          | 0.999        |
|                        | $Adj. R^2$                                             | 0.983          | 0.998        |
|                        | $RMSE$                                                 | 1.264          | 0.730        |



**Table S4.** Comparison of maximum adsorption capacity of the PNHM/Fe<sub>3</sub>O<sub>4</sub>-40 with other adsorbents for removal of arsenic (pH~7)

| Type of adsorbent                                                                                  | Maximum adsorption capacity (mg g <sup>-1</sup> ) |              | Ref.                 |
|----------------------------------------------------------------------------------------------------|---------------------------------------------------|--------------|----------------------|
|                                                                                                    | As(III)                                           | As(V)        |                      |
| Fe <sub>3</sub> O <sub>4</sub> nanoparticles                                                       | 46.06                                             | 16.56        | 6                    |
| α-Fe <sub>2</sub> O <sub>3</sub>                                                                   | 95.0                                              | 47.0         | 7                    |
| Fe <sub>3</sub> O <sub>4</sub> @Polyaniline                                                        | 1.385                                             | 1.066        | 8                    |
| polyaniline/polystyrene nanocomposite                                                              | 52                                                | 56           | 9                    |
| Nano Zero-Valent Iron on Activated Carbon                                                          | 18.2                                              | 12.0         | 10                   |
| Porous Fe <sub>3</sub> O <sub>4</sub>                                                              | 6.77                                              | 7.23         | 11                   |
| Commercial Fe <sub>3</sub> O <sub>4</sub>                                                          | 0.76                                              | 1.35         | 11                   |
| Poly(lauryl methacrylate divinybenzene)/poly(glycidyl methacrylate)/Fe <sub>3</sub> O <sub>4</sub> | 53.97                                             | -            | 12                   |
| Fe <sub>2</sub> O <sub>3</sub> @C                                                                  | 29.40                                             | 17.9         | 13                   |
| Fe <sub>3</sub> O <sub>4</sub> -Honeycomb briquette cinders                                        | 1.566                                             | 1.288        | 14                   |
| <b>PNHM/Fe<sub>3</sub>O<sub>4</sub>-40</b>                                                         | <b>28.27</b>                                      | <b>83.08</b> | <b>Present study</b> |

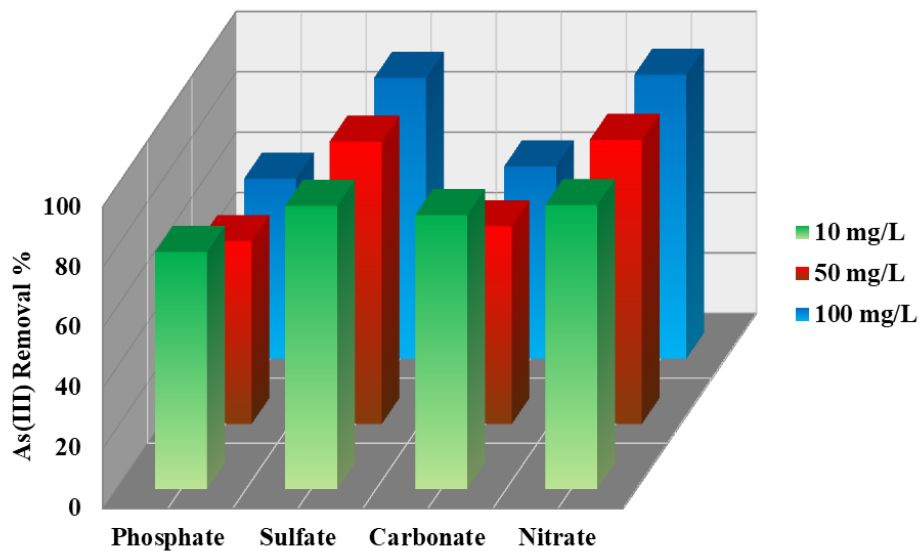

**Figure S9.** Effect of competing ions on removal of As(III) using PNHM/Fe<sub>3</sub>O<sub>4</sub>-40 (Experimental conditions: adsorbent dose: 1g L<sup>-1</sup>; C<sub>0</sub>: 1000 μg L<sup>-1</sup>; T: 300±3 K; contact time: 240 min).

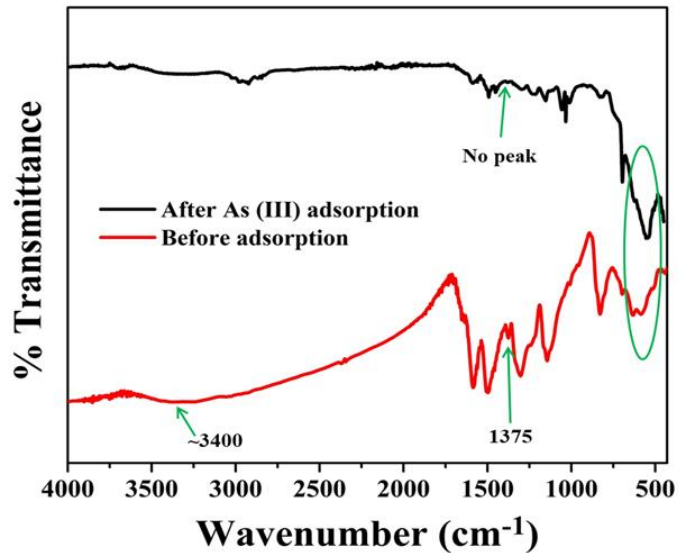

**Figure S10.** FTIR spectra of PNHM/Fe<sub>3</sub>O<sub>4</sub>-40 composite particles at before and after As(III) adsorption.

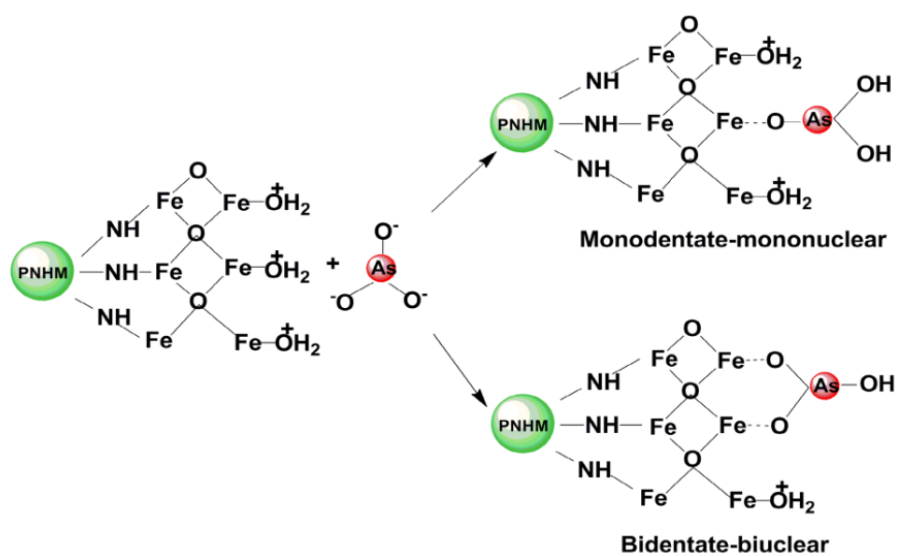

**Figure S11.** Probable mechanism of arsenic adsorption on PNHM/Fe<sub>3</sub>O<sub>4</sub>-40 at pH ~7.

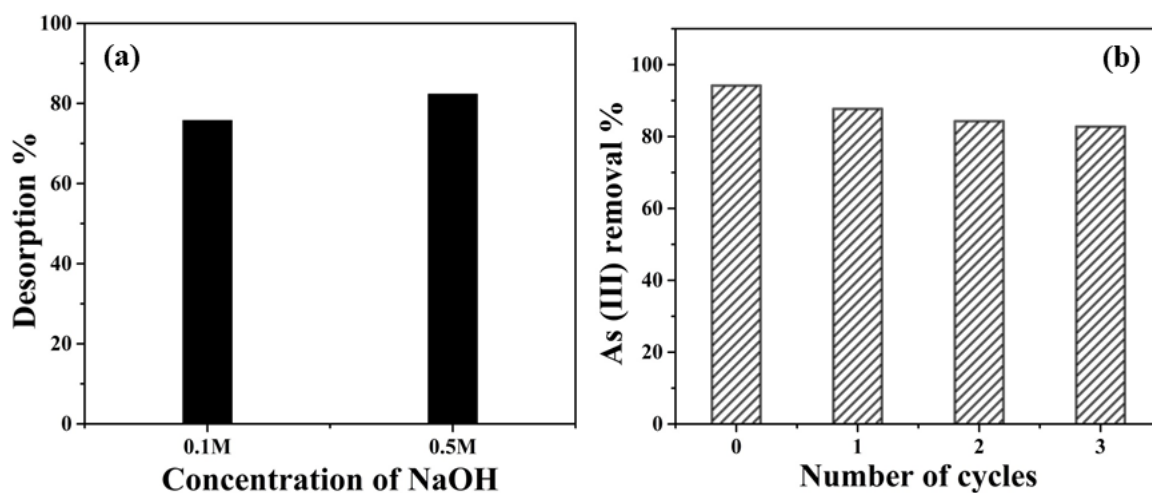

**Figure S12.** (a) Desorption of As(III) from loaded PNHM/Fe<sub>3</sub>O<sub>4</sub>-40 with different concentration of NaOH solutions; (b) As(III) removal % using regenerated PNHM/Fe<sub>3</sub>O<sub>4</sub>-40 upto three adsorption/desorption cycles (Experimental conditions: C<sub>0</sub>: 1000 μg L<sup>-1</sup>, dose 1g L<sup>-1</sup>, T: 300±3 K, pH~7).

**Table S5.** Physicochemical parameters of naturally arsenic contaminated groundwater sample

| <b>Parameters</b>                            | <b>Quantity</b> |
|----------------------------------------------|-----------------|
| Total arsenic ( $\mu\text{g L}^{-1}$ )       | 152.54          |
| Conductivity ( $\mu\text{s cm}^{-1}$ )       | 2402            |
| Total dissolved solid ( $\text{mg L}^{-1}$ ) | 1404            |
| Salinity (PSU)                               | 1.09            |
| pH                                           | 7.13            |
| Turbidity (NTU)                              | 59.27           |
| Sodium ( $\text{mg L}^{-1}$ )                | 239.348         |
| Potassium ( $\text{mg L}^{-1}$ )             | 273.596         |
| Calcium ( $\text{mg L}^{-1}$ )               | 65.920          |
| Magnesium ( $\text{mg L}^{-1}$ )             | 0.576           |
| Chloride ( $\text{mg L}^{-1}$ )              | 377.742         |
| Phosphate ( $\text{mg L}^{-1}$ )             | 1.153           |
| Total alkalinity ( $\text{mg L}^{-1}$ )      | 480             |
| Total suspended solid ( $\text{mg L}^{-1}$ ) | 41              |

## REFERENCES

1. Ho, Y. S. & McKay, G. A Comparison of Chemisorption Kinetic Models Applied to Pollutant Removal on Various Sorbents. *Process Safety and Environmental Protection* **76**, 332–340 (1998).
2. Qiu, H. *et al.* Critical review in adsorption kinetic models. *Journal of Zhejiang University-Science A* **10**, 716–724 (2009).
3. Ho, Y. S. & McKay, G. Sorption of dye from aqueous solution by peat. *Chemical Engineering Journal* **70**, 115–124 (1998).
4. Bhaumik, M., Noubactep, C., Gupta, V. K., McCrindle, R. I. & Maity, A. Polyaniline/Fe<sup>0</sup> composite nanofibers: An excellent adsorbent for the removal of arsenic from aqueous solutions. *Chemical Engineering Journal* **271**, 135–146 (2015).
5. Srivastava, S. K., Senapati, S., Singh, S. B. & Raul, P. K. Magnetic Ni/PPy nanocomposite as effective reusable adsorbent for removal of arsenite and fluoride from contaminated water. *RSC Advances* **6**, 113424–113431 (2016).
6. Feng, L., Cao, M., Ma, X., Zhu, Y. & Hu, C. Superparamagnetic high-surface-area Fe<sub>3</sub>O<sub>4</sub> nanoparticles as adsorbents for arsenic removal. *Journal of Hazardous Materials* **217–218**, 439–446 (2012).
7. Tang, W., Li, Q., Gao, S. & Shang, J. K. Arsenic(III,V) removal from aqueous solution by ultrafine  $\alpha$ -Fe<sub>2</sub>O<sub>3</sub> nanoparticles synthesized from solvent thermal method. *Journal of Hazardous Materials* **192**, 131–138 (2011).
8. Zhou, Q., Wang, J., Liao, X., Xiao, J. & Fan, H. Removal of As(III) and As(V) from water using magnetic core-shell nanomaterial Fe<sub>3</sub>O<sub>4</sub>@polyaniline. *International Journal of Green Technology* **1**, 54–64 (2015).
9. Davodi, B. & Jahangiri, M. Determination of optimum conditions for removal of As(III) and As(V) by polyaniline/polystyrene nanocomposite. *Synthetic Metals* **194**, 97–101 (2014).
10. Zhu, H., Jia, Y., Wu, X. & Wang, H. Removal of arsenic from water by supported nano zero-valent iron on activated carbon. *Journal of Hazardous Materials* **172**, 1591–1596 (2009).
11. Wang, T. *et al.* Controllable Synthesis of Hierarchical Porous Fe<sub>3</sub>O<sub>4</sub> Particles Mediated by Poly(diallyldimethylammonium chloride) and Their Application in Arsenic Removal. *ACS Applied Materials & Interfaces* **5**, 12449–12459 (2013).
12. Shabnam, R. *et al.* Novel Magnetically Doped Epoxide Functional Cross-linked Hydrophobic Poly(lauryl methacrylate) Composite Polymer Particles for Removal of As(III) from Aqueous Solution. *Industrial & Engineering Chemistry Research* **56**, 7747–7756 (2017).
13. Wu, Z., Li, W., Webley, P. A. & Zhao, D. General and controllable synthesis of novel mesoporous magnetic iron oxide@carbon encapsulates for efficient arsenic removal. *Advanced Materials* **24**, 485–491 (2012).
14. Baig, S. A. *et al.* Arsenic removal from aqueous solutions using Fe<sub>3</sub>O<sub>4</sub>-HBC composite: effect of calcination on adsorbents performance. *PloS one* **9**, e100704 (2014).
